# Supplementary material for: Pollinator-Driven Speciation in Sexually Deceptive Orchids
Source: Hindawi journal article supplement (doi:10.1155/2012/285081), 2012-01-01
Supplement: f1 [file 285081.f1.xls]

## Sheet: Species_overlap_table_Chiloglot
Note: This table contains detailed information of pairwise species comparison. Closely related species groups were defined based on phylogenetic tree of Ophrys (ref. 36 in the manuscript) and Chiloglottis (ref. 22); the information of species distribution and floral traits were extracted from ref. 33 (for Ophrys) , and ref. 38 (for Chiloglottis); pollinator information was extracted from ref. 37 …
Group	Genus	Species_A	Species_B	Pollinator_A	Pollinator_B	Overlap_LipLength	Overlap_Alttitude	Overlap_Phenology	Overlap_Distribution	Overlap_pollinator	Overlap_ChemType
A	Chiloglottis	cornuta	grammata	Selfing	Eirone leai	60	71.8093	0	YES	NO	NO
D	Chiloglottis	pluricallata	turfosa	N. sp. (impatiens3)	N. sp. (carinicollis3)	50	0.166389	16.6667	YES	NO	NO
D	Chiloglottis	pluricallata	triceratops	N. sp. (impatiens3)	N. carinicollis	30	0	16.6667	NO	NO	NO
D	Chiloglottis	pluricallata	gunnii	N. sp. (impatiens3)	Eirone sp.	75	0	0	NO	NO	NO
D	Chiloglottis	pluricallata	valida	N. sp. (impatiens3)	N. monticola	0	40.4341	16.6667	YES	NO	NO
D	Chiloglottis	turfosa	triceratops	N. sp. (carinicollis3)	N. carinicollis	50	0	40	NO	YES	YES
D	Chiloglottis	turfosa	gunnii	N. sp. (carinicollis3)	Eirone sp.	50	0	16.6667	NO	NO	NO
D	Chiloglottis	turfosa	valida	N. sp. (carinicollis3)	N. monticola	0	25.2903	66.6667	YES	NO	NO
D	Chiloglottis	triceratops	gunnii	N. carinicollis	Eirone sp.	33.3333	100	16.6667	YES	NO	NO
D	Chiloglottis	triceratops	valida	N. carinicollis	N. monticola	26.6667	39.1283	60	YES	NO	NO
D	Chiloglottis	gunnii	valida	Eirone sp.	N. monticola	0	21.5932	16.6667	YES	NO	NO
E	Chiloglottis	trapeziformis	formicifera	N. cryptoides	N. sp. (nitidula5)	50	99.3758	100	YES	NO	NO
E	Chiloglottis	trapeziformis	platyptera	N. cryptoides	N. sp. 40	80	20.0533	60	YES	NO	NO
E	Chiloglottis	trapeziformis	trullata	N. cryptoides	N. usitatum	16.6667	50.0624	20	YES	NO	/
E	Chiloglottis	formicifera	platyptera	N. sp. (nitidula5)	N. sp. 40	50	20.1203	60	YES	NO	NO
E	Chiloglottis	formicifera	trullata	N. sp. (nitidula5)	N. usitatum	100	50.3769	20	NO	NO	/
E	Chiloglottis	platyptera	trullata	N. sp. 40	N. usitatum	0	27.3388	100	NO	NO	/
G	Chiloglottis	sphyrnoides	reflexa	N. sp. 3	N. sp. 30	50	44.5061	83.3333	YES	NO	/
G	Chiloglottis	sphyrnoides	trilabra	N. sp. 3	N. sp. (proxima3)	50	63.6694	100	YES	NO	NO
G	Chiloglottis	sphyrnoides	seminuda	N. sp. 3	N. sp. (proxima2)	20	33.7823	80	YES	NO	NO
G	Chiloglottis	sphyrnoides	anaticeps	N. sp. 3	N. sp. 33	50	14.408	100	YES	NO	/
G	Chiloglottis	sphyrnoides	diphylla	N. sp. 3	Arthrothynnus latus	16.6667	22.433	50	YES	NO	NO
G	Chiloglottis	sphyrnoides	longiclavata	N. sp. 3	NA	0	5.09491	14.2857	YES	/	/
G	Chiloglottis	reflexa	trilabra	N. sp. 30	N. sp. (proxima3)	100	66.6944	100	YES	NO	/
G	Chiloglottis	reflexa	seminuda	N. sp. 30	N. sp. (proxima2)	50	98.8901	83.3333	YES	NO	/
G	Chiloglottis	reflexa	anaticeps	N. sp. 30	N. sp. 33	100	8.40966	100	YES	NO	/
G	Chiloglottis	reflexa	diphylla	N. sp. 30	Arthrothynnus latus	40	99.4451	66.6667	YES	NO	/
G	Chiloglottis	reflexa	longiclavata	N. sp. 30	NA	0	3.39773	28.5714	NO	/	/
G	Chiloglottis	trilabra	seminuda	N. sp. (proxima3)	N. sp. (proxima2)	50	58.8581	60	YES	YES	NO
G	Chiloglottis	trilabra	anaticeps	N. sp. (proxima3)	N. sp. 33	100	36.4214	100	YES	NO	/
G	Chiloglottis	trilabra	diphylla	N. sp. (proxima3)	Arthrothynnus latus	40	50.2508	33.3333	YES	NO	NO
G	Chiloglottis	trilabra	longiclavata	N. sp. (proxima3)	NA	0	25.0535	0	NO	/	/
G	Chiloglottis	seminuda	anaticeps	N. sp. (proxima2)	N. sp. 33	50	0.0839631	40	YES	NO	/
G	Chiloglottis	seminuda	diphylla	N. sp. (proxima2)	Arthrothynnus latus	75	86.809	60	YES	NO	NO
G	Chiloglottis	seminuda	longiclavata	N. sp. (proxima2)	NA	25	0	16.6667	NO	/	/
G	Chiloglottis	anaticeps	diphylla	N. sp. 33	Arthrothynnus latus	40	0	16.6667	YES	NO	/
G	Chiloglottis	anaticeps	longiclavata	N. sp. 33	NA	0	50.0713	0	NO	/	/
G	Chiloglottis	diphylla	longiclavata	Arthrothynnus latus	NA	100	0	40	YES	/	/
A	Ophrys	aymoninii	insectifera	Andrena combinata (Christ)	Argogorytes fargeii (Shuckard), A. mystaceus (L.), Anthobium minutum F. (Staphylinidae)	100	75.0125	66.6667	YES	NO	NO
A	Ophrys	aymoninii	subinsectifera	Andrena combinata (Christ)	Sterictiphora furcata (Villers)	28.5714	85.7347	100	NO	NO	NO
A	Ophrys	insectifera	subinsectifera	Argogorytes fargeii (Shuckard), A. mystaceus (L.), Anthobium minutum F. (Staphylinidae)	Sterictiphora furcata (Villers)	28.5714	80.01	100	YES	NO	NO
E	Ophrys	atlantica	bilunulata	Chalicodoma parietina (Geoffr.)	Andrena flavipes Panzer	7.69231	100	75	YES	NO	/
E	Ophrys	atlantica	discors	Chalicodoma parietina (Geoffr.)	Eucera euroa Tkalc	0	100	100	NO	NO	/
E	Ophrys	atlantica	fusca	Chalicodoma parietina (Geoffr.)	Andrena sabulosa subsp. trimerana	100	100	100	YES	NO	/
E	Ophrys	atlantica	iricolor	Chalicodoma parietina (Geoffr.)	Andrena morio Brullé	90	100	100	NO	NO	/
E	Ophrys	atlantica	laurensis	Chalicodoma parietina (Geoffr.)	Andrena schulzi Strand	7.69231	56.6955	62.5	NO	NO	/
E	Ophrys	atlantica	lutea	Chalicodoma parietina (Geoffr.)	Andrena transitoria Morawitz	44.4444	83.3426	100	YES	NO	/
E	Ophrys	atlantica	pallida	Chalicodoma parietina (Geoffr.)	Andrena orbitalis Morawitz	0	100	100	NO	NO	/
E	Ophrys	atlantica	phryganae	Chalicodoma parietina (Geoffr.)	Andrena panurgimorpha Mavromoustakis (Cr), A. humilis Imhoff (It, Ae), A. tadauchii Gusenleitner (Gr), A. clypella subsp. Hasiata (Gr)	0	/	100	NO	NO	/
E	Ophrys	atlantica	sicula	Chalicodoma parietina (Geoffr.)	Andrena hesperia Sm. (Ae, Cr, Gr, It, Ls)‚ A. vulpecula Kriechbaumer, A. merula War. (Ae, Gr, Ij), A. taraxaci Giraud (Cy, Ls, It)‚ A. bicolor Fabricius.	0	100	50	YES	NO	/
E	Ophrys	atlantica	sitiaca	Chalicodoma parietina (Geoffr.)	Andrena nigroaenea (Kirby)	20	100	16.6667	NO	NO	/
E	Ophrys	bilunulata	discors	Andrena flavipes Panzer	Eucera euroa Tkalc	37.5	100	33.3333	NO	NO	/
E	Ophrys	bilunulata	fusca	Andrena flavipes Panzer	Andrena sabulosa subsp. trimerana	7.69231	100	66.6667	YES	NO	/
E	Ophrys	bilunulata	iricolor	Andrena flavipes Panzer	Andrena morio Brullé	14.2857	100	33.3333	NO	NO	/
E	Ophrys	bilunulata	laurensis	Andrena flavipes Panzer	Andrena schulzi Strand	100	56.6955	75	NO	NO	/
E	Ophrys	bilunulata	lutea	Andrena flavipes Panzer	Andrena transitoria Morawitz	22.2222	83.3426	66.6667	YES	NO	/
E	Ophrys	bilunulata	pallida	Andrena flavipes Panzer	Andrena orbitalis Morawitz	23.5294	100	33.3333	NO	NO	/
E	Ophrys	bilunulata	phryganae	Andrena flavipes Panzer	Andrena panurgimorpha Mavromoustakis (Cr), A. humilis Imhoff (It, Ae), A. tadauchii Gusenleitner (Gr), A. clypella subsp. Hasiata (Gr)	50	/	66.6667	YES	NO	/
E	Ophrys	bilunulata	sicula	Andrena flavipes Panzer	Andrena hesperia Sm. (Ae, Cr, Gr, It, Ls)‚ A. vulpecula Kriechbaumer, A. merula War. (Ae, Gr, Ij), A. taraxaci Giraud (Cy, Ls, It)‚ A. bicolor Fabricius.	50	100	40	YES	NO	/
E	Ophrys	bilunulata	sitiaca	Andrena flavipes Panzer	Andrena nigroaenea (Kirby)	42.8571	100	0	NO	NO	/
E	Ophrys	discors	fusca	Eucera euroa Tkalc	Andrena sabulosa subsp. trimerana	0	63.6694	66.6667	NO	NO	/
E	Ophrys	discors	iricolor	Eucera euroa Tkalc	Andrena morio Brullé	0	63.6694	100	NO	NO	/
E	Ophrys	discors	laurensis	Eucera euroa Tkalc	Andrena schulzi Strand	37.5	5.09491	0	YES	NO	/
E	Ophrys	discors	lutea	Eucera euroa Tkalc	Andrena transitoria Morawitz	0	38.9228	66.6667	YES	NO	/
E	Ophrys	discors	pallida	Eucera euroa Tkalc	Andrena orbitalis Morawitz	72.7273	77.8024	100	YES	NO	/
E	Ophrys	discors	phryganae	Eucera euroa Tkalc	Andrena panurgimorpha Mavromoustakis (Cr), A. humilis Imhoff (It, Ae), A. tadauchii Gusenleitner (Gr), A. clypella subsp. Hasiata (Gr)	83.3333	/	66.6667	YES	NO	/
E	Ophrys	discors	sicula	Eucera euroa Tkalc	Andrena hesperia Sm. (Ae, Cr, Gr, It, Ls)‚ A. vulpecula Kriechbaumer, A. merula War. (Ae, Gr, Ij), A. taraxaci Giraud (Cy, Ls, It)‚ A. bicolor Fabricius.	83.3333	46.7022	60	YES	NO	/
E	Ophrys	discors	sitiaca	Eucera euroa Tkalc	Andrena nigroaenea (Kirby)	0	87.5156	25	NO	NO	/
E	Ophrys	fusca	iricolor	Andrena sabulosa subsp. trimerana	Andrena morio Brullé	90	100	100	NO	NO	/
E	Ophrys	fusca	laurensis	Andrena sabulosa subsp. trimerana	Andrena schulzi Strand	7.69231	40.9628	50	NO	NO	/
E	Ophrys	fusca	lutea	Andrena sabulosa subsp. trimerana	Andrena transitoria Morawitz	44.4444	61.1327	100	YES	NO	/
E	Ophrys	fusca	pallida	Andrena sabulosa subsp. trimerana	Andrena orbitalis Morawitz	0	100	100	NO	NO	/
E	Ophrys	fusca	phryganae	Andrena sabulosa subsp. trimerana	Andrena panurgimorpha Mavromoustakis (Cr), A. humilis Imhoff (It, Ae), A. tadauchii Gusenleitner (Gr), A. clypella subsp. Hasiata (Gr)	0	/	100	YES	NO	/
E	Ophrys	fusca	sicula	Andrena sabulosa subsp. trimerana	Andrena hesperia Sm. (Ae, Cr, Gr, It, Ls)‚ A. vulpecula Kriechbaumer, A. merula War. (Ae, Gr, Ij), A. taraxaci Giraud (Cy, Ls, It)‚ A. bicolor Fabricius.	0	73.3511	60	YES	NO	/
E	Ophrys	fusca	sitiaca	Andrena sabulosa subsp. trimerana	Andrena nigroaenea (Kirby)	20	100	20	NO	NO	/
E	Ophrys	iricolor	laurensis	Andrena morio Brullé	Andrena schulzi Strand	14.2857	40.9628	0	NO	NO	/
E	Ophrys	iricolor	lutea	Andrena morio Brullé	Andrena transitoria Morawitz	100	61.1327	66.6667	YES	NO	/
E	Ophrys	iricolor	pallida	Andrena morio Brullé	Andrena orbitalis Morawitz	0	100	100	NO	NO	/
E	Ophrys	iricolor	phryganae	Andrena morio Brullé	Andrena panurgimorpha Mavromoustakis (Cr), A. humilis Imhoff (It, Ae), A. tadauchii Gusenleitner (Gr), A. clypella subsp. Hasiata (Gr)	0	/	66.6667	YES	NO	/
E	Ophrys	iricolor	sicula	Andrena morio Brullé	Andrena hesperia Sm. (Ae, Cr, Gr, It, Ls)‚ A. vulpecula Kriechbaumer, A. merula War. (Ae, Gr, Ij), A. taraxaci Giraud (Cy, Ls, It)‚ A. bicolor Fabricius.	0	73.3511	60	YES	NO	/
E	Ophrys	iricolor	sitiaca	Andrena morio Brullé	Andrena nigroaenea (Kirby)	27.2727	100	25	YES	NO	/
E	Ophrys	laurensis	lutea	Andrena schulzi Strand	Andrena transitoria Morawitz	22.2222	63.9089	50	YES	NO	/
E	Ophrys	laurensis	pallida	Andrena schulzi Strand	Andrena orbitalis Morawitz	23.5294	25.0749	0	YES	NO	/
E	Ophrys	laurensis	phryganae	Andrena schulzi Strand	Andrena panurgimorpha Mavromoustakis (Cr), A. humilis Imhoff (It, Ae), A. tadauchii Gusenleitner (Gr), A. clypella subsp. Hasiata (Gr)	50	/	50	YES	NO	/
E	Ophrys	laurensis	sicula	Andrena schulzi Strand	Andrena hesperia Sm. (Ae, Cr, Gr, It, Ls)‚ A. vulpecula Kriechbaumer, A. merula War. (Ae, Gr, Ij), A. taraxaci Giraud (Cy, Ls, It)‚ A. bicolor Fabricius.	50	56.6955	30	YES	NO	/
E	Ophrys	laurensis	sitiaca	Andrena schulzi Strand	Andrena nigroaenea (Kirby)	42.8571	15.0849	0	NO	NO	/
E	Ophrys	lutea	pallida	Andrena transitoria Morawitz	Andrena orbitalis Morawitz	0	100	100	YES	NO	/
E	Ophrys	lutea	phryganae	Andrena transitoria Morawitz	Andrena panurgimorpha Mavromoustakis (Cr), A. humilis Imhoff (It, Ae), A. tadauchii Gusenleitner (Gr), A. clypella subsp. Hasiata (Gr)	0	/	100	YES	NO	/
E	Ophrys	lutea	sicula	Andrena transitoria Morawitz	Andrena hesperia Sm. (Ae, Cr, Gr, It, Ls)‚ A. vulpecula Kriechbaumer, A. merula War. (Ae, Gr, Ij), A. taraxaci Giraud (Cy, Ls, It)‚ A. bicolor Fabricius.	0	100	60	YES	NO	/
E	Ophrys	lutea	sitiaca	Andrena transitoria Morawitz	Andrena nigroaenea (Kirby)	50	100	20	YES	NO	/
E	Ophrys	pallida	phryganae	Andrena orbitalis Morawitz	Andrena panurgimorpha Mavromoustakis (Cr), A. humilis Imhoff (It, Ae), A. tadauchii Gusenleitner (Gr), A. clypella subsp. Hasiata (Gr)	61.5385	/	66.6667	YES	NO	/
E	Ophrys	pallida	sicula	Andrena orbitalis Morawitz	Andrena hesperia Sm. (Ae, Cr, Gr, It, Ls)‚ A. vulpecula Kriechbaumer, A. merula War. (Ae, Gr, Ij), A. taraxaci Giraud (Cy, Ls, It)‚ A. bicolor Fabricius.	61.5385	60.0266	60	YES	NO	/
E	Ophrys	pallida	sitiaca	Andrena orbitalis Morawitz	Andrena nigroaenea (Kirby)	0	100	25	NO	NO	/
E	Ophrys	phryganae	sicula	Andrena panurgimorpha Mavromoustakis (Cr), A. humilis Imhoff (It, Ae), A. tadauchii Gusenleitner (Gr), A. clypella subsp. Hasiata (Gr)	Andrena hesperia Sm. (Ae, Cr, Gr, It, Ls)‚ A. vulpecula Kriechbaumer, A. merula War. (Ae, Gr, Ij), A. taraxaci Giraud (Cy, Ls, It)‚ A. bicolor Fabricius.	100	/	60	YES	NO	/
E	Ophrys	phryganae	sitiaca	Andrena panurgimorpha Mavromoustakis (Cr), A. humilis Imhoff (It, Ae), A. tadauchii Gusenleitner (Gr), A. clypella subsp. Hasiata (Gr)	Andrena nigroaenea (Kirby)	11.1111	/	20	YES	NO	/
E	Ophrys	sicula	sitiaca	Andrena hesperia Sm. (Ae, Cr, Gr, It, Ls)‚ A. vulpecula Kriechbaumer, A. merula War. (Ae, Gr, Ij), A. taraxaci Giraud (Cy, Ls, It)‚ A. bicolor Fabricius.	Andrena nigroaenea (Kirby)	11.1111	100	100	YES	NO	/
G	Ophrys	aesculapii	araneola	Andrena paucisquama Noskiewicz	Andrena lathyri Alfken‚ and Andrena combinata (Christ)	15.3846	76.9408	100	NO	NO	/
G	Ophrys	aesculapii	benacensis	Andrena paucisquama Noskiewicz	Chalicodoma parietina (Geoffr.)	0	80.02	66.6667	NO	NO	/
G	Ophrys	aesculapii	bertolonii	Andrena paucisquama Noskiewicz	Chalicodoma parietina (Geoffr.), C. pyrenaica (Lep.)	0	68.9869	50	YES	NO	/
G	Ophrys	aesculapii	cretica	Andrena paucisquama Noskiewicz	Melecta tuberculata Lieftinck	50	83.3472	100	YES	NO	/
G	Ophrys	aesculapii	drumana	Andrena paucisquama Noskiewicz	Chalicodoma albonotata (Radoszkowski)	83.3333	68.2107	25	NO	NO	/
G	Ophrys	aesculapii	exaltata	Andrena paucisquama Noskiewicz	Colletes cunicularius (L.)	57.1429	100	83.3333	NO	NO	/
G	Ophrys	aesculapii	explanata	Andrena paucisquama Noskiewicz	Chalicodoma sicula (Rossi)	28.5714	100	100	NO	NO	/
G	Ophrys	aesculapii	ferrum-equinum	Andrena paucisquama Noskiewicz	Chalicodoma parietina (Geoffr.)	22.2222	90.9173	100	YES	NO	/
G	Ophrys	aesculapii	incubacea	Andrena paucisquama Noskiewicz	Andrena morio Brullé	50	76.9408	100	NO	NO	/
G	Ophrys	aesculapii	lunulata	Andrena paucisquama Noskiewicz	Osmia kohlii Ducke	50	100	100	NO	NO	/
G	Ophrys	aesculapii	mammosa	Andrena paucisquama Noskiewicz	Andrena fuscosa Erichson	11.1111	71.449	100	YES	NO	/
G	Ophrys	aesculapii	morisii	Andrena paucisquama Noskiewicz	Anthophora sicheli Radoszkowski	37.5	71.449	100	NO	NO	/
G	Ophrys	aesculapii	panormitana	Andrena paucisquama Noskiewicz	Andrena thoracica (Fabricius), A. nigroaenea (Kirby)	28.5714	100	25	NO	NO	/
G	Ophrys	aesculapii	reinholdii	Andrena paucisquama Noskiewicz	Melecta sp., Anthophora obscura, Eupavlovskia obscura Friese, E. funeraria Sm	42.8571	76.9408	75	YES	NO	/
G	Ophrys	aesculapii	sphegodes	Andrena paucisquama Noskiewicz	Andrena nigroaenea Kirby (Br, Ga, It), A. barbilabris Kirby (Ga), A. thoracica (Fabricius), A. cineraria L. (Ga), A. limata Eversmann (Ge)	37.5	76.9408	66.6667	YES	NO	/
G	Ophrys	aesculapii	spruneri	Andrena paucisquama Noskiewicz	Xylocopa iris (Christ)	11.1111	100	50	YES	NO	/
G	Ophrys	araneola	benacensis	Andrena lathyri Alfken‚ and Andrena combinata (Christ)	Chalicodoma parietina (Geoffr.)	0	84.6272	66.6667	YES	NO	/
G	Ophrys	araneola	bertolonii	Andrena lathyri Alfken‚ and Andrena combinata (Christ)	Chalicodoma parietina (Geoffr.), C. pyrenaica (Lep.)	0	89.6623	50	YES	NO	/
G	Ophrys	araneola	cretica	Andrena lathyri Alfken‚ and Andrena combinata (Christ)	Melecta tuberculata Lieftinck	0	100	100	NO	NO	/
G	Ophrys	araneola	drumana	Andrena lathyri Alfken‚ and Andrena combinata (Christ)	Chalicodoma albonotata (Radoszkowski)	26.6667	80.784	25	YES	NO	/
G	Ophrys	araneola	exaltata	Andrena lathyri Alfken‚ and Andrena combinata (Christ)	Colletes cunicularius (L.)	10.5263	100	83.3333	YES	NO	/
G	Ophrys	araneola	explanata	Andrena lathyri Alfken‚ and Andrena combinata (Christ)	Chalicodoma sicula (Rossi)	0	100	100	NO	NO	/
G	Ophrys	araneola	ferrum-equinum	Andrena lathyri Alfken‚ and Andrena combinata (Christ)	Chalicodoma parietina (Geoffr.)	0	100	100	NO	NO	/
G	Ophrys	araneola	incubacea	Andrena lathyri Alfken‚ and Andrena combinata (Christ)	Andrena morio Brullé	0	100	100	YES	NO	/
G	Ophrys	araneola	lunulata	Andrena lathyri Alfken‚ and Andrena combinata (Christ)	Osmia kohlii Ducke	0	100	100	NO	NO	/
G	Ophrys	araneola	mammosa	Andrena lathyri Alfken‚ and Andrena combinata (Christ)	Andrena fuscosa Erichson	0	92.8622	100	NO	NO	/
G	Ophrys	araneola	morisii	Andrena lathyri Alfken‚ and Andrena combinata (Christ)	Anthophora sicheli Radoszkowski	0	92.8622	100	NO	NO	/
G	Ophrys	araneola	panormitana	Andrena lathyri Alfken‚ and Andrena combinata (Christ)	Andrena thoracica (Fabricius), A. nigroaenea (Kirby)	0	100	25	NO	NO	/
G	Ophrys	araneola	reinholdii	Andrena lathyri Alfken‚ and Andrena combinata (Christ)	Melecta sp., Anthophora obscura, Eupavlovskia obscura Friese, E. funeraria Sm	0	100	75	NO	NO	/
G	Ophrys	araneola	sphegodes	Andrena lathyri Alfken‚ and Andrena combinata (Christ)	Andrena nigroaenea Kirby (Br, Ga, It), A. barbilabris Kirby (Ga), A. thoracica (Fabricius), A. cineraria L. (Ga), A. limata Eversmann (Ge)	0	100	66.6667	YES	NO	/
G	Ophrys	araneola	spruneri	Andrena lathyri Alfken‚ and Andrena combinata (Christ)	Xylocopa iris (Christ)	0	100	50	NO	NO	/
G	Ophrys	benacensis	bertolonii	Chalicodoma parietina (Geoffr.)	Chalicodoma parietina (Geoffr.), C. pyrenaica (Lep.)	62.5	86.2164	66.6667	YES	YES	/
G	Ophrys	benacensis	cretica	Chalicodoma parietina (Geoffr.)	Melecta tuberculata Lieftinck	0	83.3472	33.3333	NO	NO	/
G	Ophrys	benacensis	drumana	Chalicodoma parietina (Geoffr.)	Chalicodoma albonotata (Radoszkowski)	0	66.7037	33.3333	NO	NO	/
G	Ophrys	benacensis	exaltata	Chalicodoma parietina (Geoffr.)	Colletes cunicularius (L.)	8.33333	70.6228	40	YES	NO	/
G	Ophrys	benacensis	explanata	Chalicodoma parietina (Geoffr.)	Chalicodoma sicula (Rossi)	10	70.6228	33.3333	NO	NO	/
G	Ophrys	benacensis	ferrum-equinum	Chalicodoma parietina (Geoffr.)	Chalicodoma parietina (Geoffr.)	30	81.8347	66.6667	NO	YES	/
G	Ophrys	benacensis	incubacea	Chalicodoma parietina (Geoffr.)	Andrena morio Brullé	0	84.6272	66.6667	YES	NO	/
G	Ophrys	benacensis	lunulata	Chalicodoma parietina (Geoffr.)	Osmia kohlii Ducke	0	80.02	33.3333	NO	NO	/
G	Ophrys	benacensis	mammosa	Chalicodoma parietina (Geoffr.)	Andrena fuscosa Erichson	33.3333	85.7245	33.3333	NO	NO	/
G	Ophrys	benacensis	morisii	Chalicodoma parietina (Geoffr.)	Anthophora sicheli Radoszkowski	18.1818	85.7245	66.6667	NO	NO	/
G	Ophrys	benacensis	panormitana	Chalicodoma parietina (Geoffr.)	Andrena thoracica (Fabricius), A. nigroaenea (Kirby)	10	77.8024	0	NO	NO	/
G	Ophrys	benacensis	reinholdii	Chalicodoma parietina (Geoffr.)	Melecta sp., Anthophora obscura, Eupavlovskia obscura Friese, E. funeraria Sm	9.09091	84.6272	75	NO	NO	/
G	Ophrys	benacensis	sphegodes	Chalicodoma parietina (Geoffr.)	Andrena nigroaenea Kirby (Br, Ga, It), A. barbilabris Kirby (Ga), A. thoracica (Fabricius), A. cineraria L. (Ga), A. limata Eversmann (Ge)	18.1818	84.6272	100	YES	NO	/
G	Ophrys	benacensis	spruneri	Chalicodoma parietina (Geoffr.)	Xylocopa iris (Christ)	33.3333	77.8024	25	NO	NO	/
G	Ophrys	bertolonii	cretica	Chalicodoma parietina (Geoffr.), C. pyrenaica (Lep.)	Melecta tuberculata Lieftinck	20	100	25	YES	NO	/
G	Ophrys	bertolonii	drumana	Chalicodoma parietina (Geoffr.), C. pyrenaica (Lep.)	Chalicodoma albonotata (Radoszkowski)	8.33333	82.7705	66.6667	NO	NO	/
G	Ophrys	bertolonii	exaltata	Chalicodoma parietina (Geoffr.), C. pyrenaica (Lep.)	Colletes cunicularius (L.)	27.2727	100	28.5714	YES	NO	/
G	Ophrys	bertolonii	explanata	Chalicodoma parietina (Geoffr.), C. pyrenaica (Lep.)	Chalicodoma sicula (Rossi)	33.3333	100	25	YES	NO	/
G	Ophrys	bertolonii	ferrum-equinum	Chalicodoma parietina (Geoffr.), C. pyrenaica (Lep.)	Chalicodoma parietina (Geoffr.)	55.5556	100	50	YES	YES	/
G	Ophrys	bertolonii	incubacea	Chalicodoma parietina (Geoffr.), C. pyrenaica (Lep.)	Andrena morio Brullé	20	100	50	YES	NO	/
G	Ophrys	bertolonii	lunulata	Chalicodoma parietina (Geoffr.), C. pyrenaica (Lep.)	Osmia kohlii Ducke	20	100	25	YES	NO	/
G	Ophrys	bertolonii	mammosa	Chalicodoma parietina (Geoffr.), C. pyrenaica (Lep.)	Andrena fuscosa Erichson	62.5	100	25	YES	NO	/
G	Ophrys	bertolonii	morisii	Chalicodoma parietina (Geoffr.), C. pyrenaica (Lep.)	Anthophora sicheli Radoszkowski	40	100	50	NO	NO	/
G	Ophrys	bertolonii	panormitana	Chalicodoma parietina (Geoffr.), C. pyrenaica (Lep.)	Andrena thoracica (Fabricius), A. nigroaenea (Kirby)	33.3333	100	0	YES	NO	/
G	Ophrys	bertolonii	reinholdii	Chalicodoma parietina (Geoffr.), C. pyrenaica (Lep.)	Melecta sp., Anthophora obscura, Eupavlovskia obscura Friese, E. funeraria Sm	30	100	75	YES	NO	/
G	Ophrys	bertolonii	sphegodes	Chalicodoma parietina (Geoffr.), C. pyrenaica (Lep.)	Andrena nigroaenea Kirby (Br, Ga, It), A. barbilabris Kirby (Ga), A. thoracica (Fabricius), A. cineraria L. (Ga), A. limata Eversmann (Ge)	40	100	100	YES	NO	/
G	Ophrys	bertolonii	spruneri	Chalicodoma parietina (Geoffr.), C. pyrenaica (Lep.)	Xylocopa iris (Christ)	62.5	100	20	YES	NO	/
G	Ophrys	cretica	drumana	Melecta tuberculata Lieftinck	Chalicodoma albonotata (Radoszkowski)	57.1429	79.184	0	NO	NO	/
G	Ophrys	cretica	exaltata	Melecta tuberculata Lieftinck	Colletes cunicularius (L.)	85.7143	100	75	NO	NO	/
G	Ophrys	cretica	explanata	Melecta tuberculata Lieftinck	Chalicodoma sicula (Rossi)	66.6667	100	100	NO	NO	/
G	Ophrys	cretica	ferrum-equinum	Melecta tuberculata Lieftinck	Chalicodoma parietina (Geoffr.)	50	100	66.6667	YES	NO	/
G	Ophrys	cretica	incubacea	Melecta tuberculata Lieftinck	Andrena morio Brullé	100	92.3136	66.6667	NO	NO	/
G	Ophrys	cretica	lunulata	Melecta tuberculata Lieftinck	Osmia kohlii Ducke	100	100	100	NO	NO	/
G	Ophrys	cretica	mammosa	Melecta tuberculata Lieftinck	Andrena fuscosa Erichson	37.5	85.7245	100	YES	NO	/
G	Ophrys	cretica	morisii	Melecta tuberculata Lieftinck	Anthophora sicheli Radoszkowski	71.4286	85.7245	66.6667	NO	NO	/
G	Ophrys	cretica	panormitana	Melecta tuberculata Lieftinck	Andrena thoracica (Fabricius), A. nigroaenea (Kirby)	66.6667	100	33.3333	NO	NO	/
G	Ophrys	cretica	reinholdii	Melecta tuberculata Lieftinck	Melecta sp., Anthophora obscura, Eupavlovskia obscura Friese, E. funeraria Sm	83.3333	92.3136	50	YES	NO	/
G	Ophrys	cretica	sphegodes	Melecta tuberculata Lieftinck	Andrena nigroaenea Kirby (Br, Ga, It), A. barbilabris Kirby (Ga), A. thoracica (Fabricius), A. cineraria L. (Ga), A. limata Eversmann (Ge)	71.4286	92.3136	33.3333	YES	NO	/
G	Ophrys	cretica	spruneri	Melecta tuberculata Lieftinck	Xylocopa iris (Christ)	37.5	100	66.6667	YES	NO	/
G	Ophrys	drumana	exaltata	Chalicodoma albonotata (Radoszkowski)	Colletes cunicularius (L.)	62.5	50.0454	0	NO	NO	/
G	Ophrys	drumana	explanata	Chalicodoma albonotata (Radoszkowski)	Chalicodoma sicula (Rossi)	37.5	50.0454	0	NO	NO	/
G	Ophrys	drumana	ferrum-equinum	Chalicodoma albonotata (Radoszkowski)	Chalicodoma parietina (Geoffr.)	30	77.2934	25	NO	NO	/
G	Ophrys	drumana	incubacea	Chalicodoma albonotata (Radoszkowski)	Andrena morio Brullé	57.1429	80.784	25	YES	NO	/
G	Ophrys	drumana	lunulata	Chalicodoma albonotata (Radoszkowski)	Osmia kohlii Ducke	57.1429	68.2107	0	NO	NO	/
G	Ophrys	drumana	mammosa	Chalicodoma albonotata (Radoszkowski)	Andrena fuscosa Erichson	20	82.1556	0	NO	NO	/
G	Ophrys	drumana	morisii	Chalicodoma albonotata (Radoszkowski)	Anthophora sicheli Radoszkowski	44.4444	82.1556	25	NO	NO	/
G	Ophrys	drumana	panormitana	Chalicodoma albonotata (Radoszkowski)	Andrena thoracica (Fabricius), A. nigroaenea (Kirby)	37.5	59.1281	0	NO	NO	/
G	Ophrys	drumana	reinholdii	Chalicodoma albonotata (Radoszkowski)	Melecta sp., Anthophora obscura, Eupavlovskia obscura Friese, E. funeraria Sm	50	80.784	50	NO	NO	/
G	Ophrys	drumana	sphegodes	Chalicodoma albonotata (Radoszkowski)	Andrena nigroaenea Kirby (Br, Ga, It), A. barbilabris Kirby (Ga), A. thoracica (Fabricius), A. cineraria L. (Ga), A. limata Eversmann (Ge)	44.4444	80.784	33.3333	YES	NO	/
G	Ophrys	drumana	spruneri	Chalicodoma albonotata (Radoszkowski)	Xylocopa iris (Christ)	20	59.1281	0	NO	NO	/
G	Ophrys	exaltata	explanata	Colletes cunicularius (L.)	Chalicodoma sicula (Rossi)	71.4286	100	75	YES	NO	/
G	Ophrys	exaltata	ferrum-equinum	Colletes cunicularius (L.)	Chalicodoma parietina (Geoffr.)	55.5556	72.752	83.3333	NO	NO	/
G	Ophrys	exaltata	incubacea	Colletes cunicularius (L.)	Andrena morio Brullé	85.7143	61.568	83.3333	YES	NO	NO
G	Ophrys	exaltata	lunulata	Colletes cunicularius (L.)	Osmia kohlii Ducke	85.7143	80.02	75	YES	NO	/
G	Ophrys	exaltata	mammosa	Colletes cunicularius (L.)	Andrena fuscosa Erichson	44.4444	57.1734	75	YES	NO	/
G	Ophrys	exaltata	morisii	Colletes cunicularius (L.)	Anthophora sicheli Radoszkowski	75	57.1734	83.3333	NO	NO	/
G	Ophrys	exaltata	panormitana	Colletes cunicularius (L.)	Andrena thoracica (Fabricius), A. nigroaenea (Kirby)	71.4286	88.9012	0	YES	NO	/
G	Ophrys	exaltata	reinholdii	Colletes cunicularius (L.)	Melecta sp., Anthophora obscura, Eupavlovskia obscura Friese, E. funeraria Sm	85.7143	61.568	87.5	YES	NO	/
G	Ophrys	exaltata	sphegodes	Colletes cunicularius (L.)	Andrena nigroaenea Kirby (Br, Ga, It), A. barbilabris Kirby (Ga), A. thoracica (Fabricius), A. cineraria L. (Ga), A. limata Eversmann (Ge)	75	61.568	40	YES	NO	NO
G	Ophrys	exaltata	spruneri	Colletes cunicularius (L.)	Xylocopa iris (Christ)	44.4444	88.9012	50	NO	NO	/
G	Ophrys	explanata	ferrum-equinum	Chalicodoma sicula (Rossi)	Chalicodoma parietina (Geoffr.)	71.4286	72.752	66.6667	NO	NO	/
G	Ophrys	explanata	incubacea	Chalicodoma sicula (Rossi)	Andrena morio Brullé	66.6667	61.568	66.6667	YES	NO	NO
G	Ophrys	explanata	lunulata	Chalicodoma sicula (Rossi)	Osmia kohlii Ducke	66.6667	80.02	100	YES	NO	/
G	Ophrys	explanata	mammosa	Chalicodoma sicula (Rossi)	Andrena fuscosa Erichson	57.1429	57.1734	100	NO	NO	/
G	Ophrys	explanata	morisii	Chalicodoma sicula (Rossi)	Anthophora sicheli Radoszkowski	85.7143	57.1734	66.6667	NO	NO	/
G	Ophrys	explanata	panormitana	Chalicodoma sicula (Rossi)	Andrena thoracica (Fabricius), A. nigroaenea (Kirby)	100	88.9012	33.3333	YES	NO	/
G	Ophrys	explanata	reinholdii	Chalicodoma sicula (Rossi)	Melecta sp., Anthophora obscura, Eupavlovskia obscura Friese, E. funeraria Sm	83.3333	61.568	50	NO	NO	/
G	Ophrys	explanata	sphegodes	Chalicodoma sicula (Rossi)	Andrena nigroaenea Kirby (Br, Ga, It), A. barbilabris Kirby (Ga), A. thoracica (Fabricius), A. cineraria L. (Ga), A. limata Eversmann (Ge)	85.7143	61.568	33.3333	NO	NO	/
G	Ophrys	explanata	spruneri	Chalicodoma sicula (Rossi)	Xylocopa iris (Christ)	57.1429	88.9012	66.6667	NO	NO	/
G	Ophrys	ferrum-equinum	incubacea	Chalicodoma parietina (Geoffr.)	Andrena morio Brullé	50	84.6272	100	YES	NO	/
G	Ophrys	ferrum-equinum	lunulata	Chalicodoma parietina (Geoffr.)	Osmia kohlii Ducke	50	100	100	NO	NO	/
G	Ophrys	ferrum-equinum	mammosa	Chalicodoma parietina (Geoffr.)	Andrena fuscosa Erichson	85.7143	78.5867	100	YES	NO	/
G	Ophrys	ferrum-equinum	morisii	Chalicodoma parietina (Geoffr.)	Anthophora sicheli Radoszkowski	75	78.5867	100	NO	NO	/
G	Ophrys	ferrum-equinum	panormitana	Chalicodoma parietina (Geoffr.)	Andrena thoracica (Fabricius), A. nigroaenea (Kirby)	100	100	25	NO	NO	/
G	Ophrys	ferrum-equinum	reinholdii	Chalicodoma parietina (Geoffr.)	Melecta sp., Anthophora obscura, Eupavlovskia obscura Friese, E. funeraria Sm	62.5	84.6272	75	YES	NO	/
G	Ophrys	ferrum-equinum	sphegodes	Chalicodoma parietina (Geoffr.)	Andrena nigroaenea Kirby (Br, Ga, It), A. barbilabris Kirby (Ga), A. thoracica (Fabricius), A. cineraria L. (Ga), A. limata Eversmann (Ge)	75	84.6272	66.6667	YES	NO	/
G	Ophrys	ferrum-equinum	spruneri	Chalicodoma parietina (Geoffr.)	Xylocopa iris (Christ)	85.7143	100	50	YES	NO	/
G	Ophrys	incubacea	lunulata	Andrena morio Brullé	Osmia kohlii Ducke	100	100	100	YES	NO	/
G	Ophrys	incubacea	mammosa	Andrena morio Brullé	Andrena fuscosa Erichson	37.5	92.8622	100	YES	NO	/
G	Ophrys	incubacea	morisii	Andrena morio Brullé	Anthophora sicheli Radoszkowski	71.4286	92.8622	100	YES	NO	/
G	Ophrys	incubacea	panormitana	Andrena morio Brullé	Andrena thoracica (Fabricius), A. nigroaenea (Kirby)	66.6667	100	25	YES	NO	/
G	Ophrys	incubacea	reinholdii	Andrena morio Brullé	Melecta sp., Anthophora obscura, Eupavlovskia obscura Friese, E. funeraria Sm	83.3333	100	75	YES	NO	/
G	Ophrys	incubacea	sphegodes	Andrena morio Brullé	Andrena nigroaenea Kirby (Br, Ga, It), A. barbilabris Kirby (Ga), A. thoracica (Fabricius), A. cineraria L. (Ga), A. limata Eversmann (Ge)	71.4286	100	66.6667	YES	NO	NO
G	Ophrys	incubacea	spruneri	Andrena morio Brullé	Xylocopa iris (Christ)	37.5	100	50	NO	NO	/
G	Ophrys	lunulata	mammosa	Osmia kohlii Ducke	Andrena fuscosa Erichson	37.5	71.449	100	NO	NO	/
G	Ophrys	lunulata	morisii	Osmia kohlii Ducke	Anthophora sicheli Radoszkowski	71.4286	71.449	66.6667	NO	NO	/
G	Ophrys	lunulata	panormitana	Osmia kohlii Ducke	Andrena thoracica (Fabricius), A. nigroaenea (Kirby)	66.6667	100	33.3333	YES	NO	/
G	Ophrys	lunulata	reinholdii	Osmia kohlii Ducke	Melecta sp., Anthophora obscura, Eupavlovskia obscura Friese, E. funeraria Sm	83.3333	76.9408	50	NO	NO	/
G	Ophrys	lunulata	sphegodes	Osmia kohlii Ducke	Andrena nigroaenea Kirby (Br, Ga, It), A. barbilabris Kirby (Ga), A. thoracica (Fabricius), A. cineraria L. (Ga), A. limata Eversmann (Ge)	71.4286	76.9408	33.3333	NO	NO	/
G	Ophrys	lunulata	spruneri	Osmia kohlii Ducke	Xylocopa iris (Christ)	37.5	100	66.6667	NO	NO	/
G	Ophrys	mammosa	morisii	Andrena fuscosa Erichson	Anthophora sicheli Radoszkowski	62.5	100	66.6667	NO	NO	/
G	Ophrys	mammosa	panormitana	Andrena fuscosa Erichson	Andrena thoracica (Fabricius), A. nigroaenea (Kirby)	57.1429	100	33.3333	NO	NO	/
G	Ophrys	mammosa	reinholdii	Andrena fuscosa Erichson	Melecta sp., Anthophora obscura, Eupavlovskia obscura Friese, E. funeraria Sm	50	100	50	YES	NO	/
G	Ophrys	mammosa	sphegodes	Andrena fuscosa Erichson	Andrena nigroaenea Kirby (Br, Ga, It), A. barbilabris Kirby (Ga), A. thoracica (Fabricius), A. cineraria L. (Ga), A. limata Eversmann (Ge)	62.5	100	33.3333	YES	NO	/
G	Ophrys	mammosa	spruneri	Andrena fuscosa Erichson	Xylocopa iris (Christ)	100	100	66.6667	YES	NO	/
G	Ophrys	morisii	panormitana	Anthophora sicheli Radoszkowski	Andrena thoracica (Fabricius), A. nigroaenea (Kirby)	85.7143	100	25	NO	NO	/
G	Ophrys	morisii	reinholdii	Anthophora sicheli Radoszkowski	Melecta sp., Anthophora obscura, Eupavlovskia obscura Friese, E. funeraria Sm	100	100	75	NO	NO	/
G	Ophrys	morisii	sphegodes	Anthophora sicheli Radoszkowski	Andrena nigroaenea Kirby (Br, Ga, It), A. barbilabris Kirby (Ga), A. thoracica (Fabricius), A. cineraria L. (Ga), A. limata Eversmann (Ge)	100	100	66.6667	NO	NO	/
G	Ophrys	morisii	spruneri	Anthophora sicheli Radoszkowski	Xylocopa iris (Christ)	62.5	100	50	NO	NO	/
G	Ophrys	panormitana	reinholdii	Andrena thoracica (Fabricius), A. nigroaenea (Kirby)	Melecta sp., Anthophora obscura, Eupavlovskia obscura Friese, E. funeraria Sm	83.3333	69.2544	20	NO	NO	/
G	Ophrys	panormitana	sphegodes	Andrena thoracica (Fabricius), A. nigroaenea (Kirby)	Andrena nigroaenea Kirby (Br, Ga, It), A. barbilabris Kirby (Ga), A. thoracica (Fabricius), A. cineraria L. (Ga), A. limata Eversmann (Ge)	85.7143	69.2544	0	NO	YES	/
G	Ophrys	panormitana	spruneri	Andrena thoracica (Fabricius), A. nigroaenea (Kirby)	Xylocopa iris (Christ)	57.1429	100	66.6667	NO	NO	/
G	Ophrys	reinholdii	sphegodes	Melecta sp., Anthophora obscura, Eupavlovskia obscura Friese, E. funeraria Sm	Andrena nigroaenea Kirby (Br, Ga, It), A. barbilabris Kirby (Ga), A. thoracica (Fabricius), A. cineraria L. (Ga), A. limata Eversmann (Ge)	85.7143	100	75	YES	NO	/
G	Ophrys	reinholdii	spruneri	Melecta sp., Anthophora obscura, Eupavlovskia obscura Friese, E. funeraria Sm	Xylocopa iris (Christ)	50	100	40	YES	NO	/
G	Ophrys	sphegodes	spruneri	Andrena nigroaenea Kirby (Br, Ga, It), A. barbilabris Kirby (Ga), A. thoracica (Fabricius), A. cineraria L. (Ga), A. limata Eversmann (Ge)	Xylocopa iris (Christ)	62.5	100	25	YES	NO	/
H	Ophrys	aveyronensis	fuciflora	Andrena hattorfiana (Fabricius)	Eucera nigrescens Pérez, E. longicornis (L.), Microdon latifrons Loew, M. mutabilis (L.), Phyllopertha horticola (L.)	37.5	73.3511	100	YES	NO	/
H	Ophrys	aveyronensis	oxyrrhynchos	Andrena hattorfiana (Fabricius)	Eucera graeca Radoszkowski	30.7692	50.0624	25	NO	NO	/
H	Ophrys	aveyronensis	sphegifera	Andrena hattorfiana (Fabricius)	Eucera notata Lep.	0	80.01	50	NO	NO	/
H	Ophrys	fuciflora	oxyrrhynchos	Eucera nigrescens Pérez, E. longicornis (L.), Microdon latifrons Loew, M. mutabilis (L.), Phyllopertha horticola (L.)	Eucera graeca Radoszkowski	75	100	25	YES	NO	/
H	Ophrys	fuciflora	sphegifera	Eucera nigrescens Pérez, E. longicornis (L.), Microdon latifrons Loew, M. mutabilis (L.), Phyllopertha horticola (L.)	Eucera notata Lep.	37.5	75.0125	50	YES	NO	/
H	Ophrys	oxyrrhynchos	sphegifera	Eucera graeca Radoszkowski	Eucera notata Lep.	21.4286	40.03	75	YES	NO	/
I	Ophrys	balearica	calypsus	Chalicodoma sicula (Rossi)	Eucera dalmatica Lep.	21.0526	/	28.5714	NO	NO	/
I	Ophrys	balearica	candica	Chalicodoma sicula (Rossi)	Eucera hispana Lep., E. hispana Lep.	9.52381	50.0555	100	NO	NO	/
I	Ophrys	balearica	heldreichii	Chalicodoma sicula (Rossi)	Eucera (prev. Synhalonia) rufa (=Tetralonia berlandi Dusmet), Tetralonia alternans (Brullé)	42.8571	37.552	25	NO	NO	/
I	Ophrys	balearica	scolopax	Chalicodoma sicula (Rossi)	Eucera longicornis L., Eucera nigrescens Pérez (Ga), E. interrupta Baer, E. (Hs)	9.09091	26.5138	85.7143	NO	NO	/
I	Ophrys	calypsus	candica	Eucera dalmatica Lep.	Eucera hispana Lep., E. hispana Lep.	69.2308	/	40	YES	NO	/
I	Ophrys	calypsus	heldreichii	Eucera dalmatica Lep.	Eucera (prev. Synhalonia) rufa (=Tetralonia berlandi Dusmet), Tetralonia alternans (Brullé)	46.1538	/	75	YES	NO	/
I	Ophrys	calypsus	scolopax	Eucera dalmatica Lep.	Eucera longicornis L., Eucera nigrescens Pérez (Ga), E. interrupta Baer, E. (Hs)	64.2857	/	42.8571	NO	NO	/
I	Ophrys	candica	heldreichii	Eucera hispana Lep., E. hispana Lep.	Eucera (prev. Synhalonia) rufa (=Tetralonia berlandi Dusmet), Tetralonia alternans (Brullé)	26.6667	75.0208	33.3333	YES	NO	/
I	Ophrys	candica	scolopax	Eucera hispana Lep., E. hispana Lep.	Eucera longicornis L., Eucera nigrescens Pérez (Ga), E. interrupta Baer, E. (Hs)	91.6667	52.9688	85.7143	YES	NO	/
I	Ophrys	heldreichii	scolopax	Eucera (prev. Synhalonia) rufa (=Tetralonia berlandi Dusmet), Tetralonia alternans (Brullé)	Eucera longicornis L., Eucera nigrescens Pérez (Ga), E. interrupta Baer, E. (Hs)	25	70.6055	37.5	NO	NO	/
J	Ophrys	attica	bornmuelleri	Eucera seminuda Brullé	Eucera paulusi Tkalc_, E. penicillata Risch	53.3333	66.6944	100	YES	NO	/
J	Ophrys	attica	umbilicata	Eucera seminuda Brullé	Eucera gaullei Vachal, E. galilaea Tkalc_, E. spatulata Gribodo, E. seminuda Brullé, Eucera penicillata Risch	100	66.6944	50	YES	YES	/
J	Ophrys	bornmuelleri	umbilicata	Eucera paulusi Tkalc_, E. penicillata Risch	Eucera gaullei Vachal, E. galilaea Tkalc_, E. spatulata Gribodo, E. seminuda Brullé, Eucera penicillata Risch	53.3333	100	50	YES	NO	/
